# Supplementary material for: Rescuing bacterial genome replication: essential functions to repair a double-strand break and restart DNA synthesis
Source: Research Square preprint supplement (doi:10.21203/rs.3.rs-6364374/v1), 2025-05-08
Supplement: Supplementary file 1 [file 04f607b53488d4fce1d1f0c4.xlsx]

## Sheet: Sheet1
Table S4. Primer pairs used for qPCR in this study.
Target locus	Primer #1	Sequence (5'→3')	Primer #2	Sequence (5'→3')
-90° +10 kb	oCW2291	GAAAATGCATCCTCCCTGTC	oCW2292	AGGGTTTGTGGTGTTTGCTC
-90° +5 kb	oCW2289	GCTTCATAAGCAGCGCTTTC	oCW2290	CTTAATGGATGCGGATCTGG
-90° +4 kb	oCW2287	CCGTCTGTTCCCACTTTATG	oCW2288	GAGTGCCATTATGCCTTCAG
-90° +3 kb	oCW2285	CGGCCTGTATAAAACGGATG	oCW2286	CCGTTTTCTAAGCACCTCTACG
-90° +2 kb	oCW2283	TGACTGGTGCGTTTATCGTG	oCW2284	ATCGTCAGTGCGAGCAAAAG
-90° +1 kb	oCW2281	GAGCGGGATTTTGGTCTATG	oCW2282	CGACGATGGCCACAATAAAG
-90° sgRNA target	oCW1967	AACAAATGCACCGCTGATGC	oCW1968	GTCTGTTTCCCGGCTGTTTTC
-90° -1 kb	oCW1969	TGTCCCTTCTCGGCATCATG	oCW1970	ACGAGAGAGCGGCTTTATTCAC
-90° -2 kb	oCW1973	GCCGAGTCCTCCTTTGTTTTTG	oCW1974	GAGTGTGTCTCGCTTTTCTGTTC
-90° -3 kb	oCW1975	GCAACCGTCACATTATCAAGCTC	oCW1976	GGGCACAAAAGAAGGCACATAC
-90° -4 kb	oCW1977	CAGCCCTTGTCTCATATTTCTCC	oCW1978	GCATGAGGGAAACTTTTTGTCC
-90° -5 kb	oCW1979	AAGTCCCGCTTTTGCCATC	oCW1980	TCAATCACCCTTCAGAAGTGC
-90° -10 kb	oCW1981	CTTCAACCACAGCCGGATAAAAG	oCW1982	AGCAGCGTCCCGTACTATTG
oriC	qSF11	GGGGATCAATCGGGGAAAG	qSF12	AGTAGGGCCTGTGGATTTG
+90° control	oCW1987	GCTGGGCTAAGGATCAGGTTATC	oCW1988	TAACAGCCAGGCGTATAACCAC
