# Supplementary material for: Rescuing bacterial genome replication: essential functions to repair a double-strand break and restart DNA synthesis
Source: Research Square preprint supplement (doi:10.21203/rs.3.rs-6364374/v1), 2025-05-08
Supplement: Supplementary file 2 [file 2f68a4f21050778dfcf7b613.xlsx]

## Sheet: Sheet1
Table S1. Individual non-essential repair gene knockouts tested in this study.
Gene name	Phenotype upon induction of weak nicking system
aag	Wild-type
addA	Dead
addB	Dead
bstG	Wild-type
comK	Wild-type
dinG	Wild-type
disA	Wild-type
dprA	Wild-type
exoR	Wild-type
fin	Wild-type
greA	Wild-type
hlpB	Wild-type
lexA	Wild-type
ligD	Wild-type
lrpC	Wild-type
mfd	Wild-type
mrfA	Wild-type
mrfB	Wild-type
mutL	Wild-type
mutM	Wild-type
mutS	Wild-type
mutSB	Wild-type
mutT	Wild-type
mutY	Wild-type
nfo	Wild-type
nth	Wild-type
ogt	Wild-type
pnpA	Wild-type
polA	Wild-type
polX	Wild-type
polY1	Wild-type
polY2	Wild-type
radA	Wild-type
radC	Wild-type
rarA	Wild-type
recA	Dead
recD2	Wild-type
recF	Dead
recG	Dead
recJ	Wild-type
recN	Wild-type
recO	Dead
recS	Wild-type
recR	Dead
recU	Intermediate
recX	Small colonies
rppH	Wild-type
ruvA	Small colonies
ruvB	Small colonies
sbcC	Wild-type
sbcD	Wild-type
sbcE	Small colonies
sbcF	Small colonies
splA	Wild-type
splB	Wild-type
spoIVCA	Wild-type
ssbB	Wild-type
ung	Wild-type
uvrA	Wild-type
uvrB	Wild-type
uvrC	Wild-type
walJ	Wild-type
yefB	Wild-type
yefC	Wild-type
yfjP	Wild-type
yhaZ	Wild-type
yjcD	Wild-type
yjhB	Wild-type
ykoV	Wild-type
yneB	Wild-type
yobH	Wild-type
yozK	Wild-type
yozL	Wild-type
ypvA	Wild-type
yqjX	Wild-type
yqxK	Wild-type
ywjD	Wild-type
ywqL	Wild-type
