# Supplementary material for: Rescuing bacterial genome replication: essential functions to repair a double-strand break and restart DNA synthesis
Source: Research Square preprint supplement (doi:10.21203/rs.3.rs-6364374/v1), 2025-05-08
Supplement: Supplementary file 3 [file 611454382ed7584f9a2658f1.xlsx]

## Sheet: Sheet1
Table S2. Strains used in this study.
Strain	Genotype	Parent strain	Recombinant DNA	Reference	Figure
E. coli
CW198	MG1655 MDS42 ΔdinB ΔpolB ΔumuDC ΔIS609 ΔpatD ΔydcV ΔydcU ΔydcT ΔydcS ΔydcR ΔhicA ΔhicB ΔyncJ ΔydcP ΔydcN ΔydcO ΔydcM ΔrecA(1819) Δrnh::kan			DOI: 10.1093/nar/gkac1060
DH5α	F– Φ80lacZΔM15 Δ(lacZYA-argF) U169 recA1 endA1 hsdR17 (rK–, mK+) phoA supE44 λ– thi-1 gyrA96 relA1			NCBI: txid668369
B. subtilis
BKE19220	trpC2 ΔrecQ::erm
BKK00040	trpC2 ∆recF::kan			BGSC
BKK00210	trpC2 ∆recR::kan			BGSC
BKK08520	trpC2 ∆recX::kan			BGSC
BKK09910	trpC2 ∆sbcF::kan			BGSC
BKK09920	trpC2 ∆sbcE::kan			BGSC
BKK10640	trpC2 ∆sbcD::kan			BGSC
BKK10650	trpC2 ∆sbcC::kan			BGSC
BKK15870	trpC2 ΔrecG::kan			BGSC
BKK16940	trpC2 ΔrecA::kan			BGSC
BKK19220	trpC2 ΔrecQ::kan			BGSC
BKK22310	trpC2 ΔrecU::kan			BGSC
BKK23020	trpC2 ΔrecS::kan			BGSC
BKK24240	trpC2 ΔrecN::kan			BGSC
BKK25280	trpC2 ΔrecO::kan			BGSC
BKK27480	trpC2 ΔrecD2::kan			BGSC
BKK27730	trpC2 ΔruvB::kan			BGSC
BKK27740	trpC2 ΔruvA::kan			BGSC
CW394	trpC2 amyE::spec(PHAT-priA-lacIQQ)	HM715	pCW300	This study
CW403	trpC2 amyE::spec(PHAT-priA-lacIQQ) ΔpriA::cat(PVEG-bgaB)	CW394	pCW301	This study
CW422	trpC2 amyE::spec(PHAT-RBS+10-priA-ssrA-lacIQQ)	HM715	pCW327	This study
CW423	trpC2 amyE::spec(PHAT-RBS+10-priA-ssrA-lacIQQ) ΔpriA::cat(PVEG-bgaB)	CW422	CW403	This study
CW483	trpC2 ∆6			DOI: 10.1093/nar/gkad277	2H, S1A, S1B, S1D, S6B, S6C, S9D, S9E, S12A
CW490	trpC2 ∆6 ganA::erm(xylR PXYL-cas9H840A)	CW483	pCW367	This study
CW529	trpC2 ∆6 ganA::erm(xylR PXYL-cas9D10A)	CW483	pCW368	This study
CW541	trpC2 ∆6 ganA::erm(xylR PXYL-cas9D10A-H840A)	CW483	pJMP1	This study
CW720	trpC2 ∆6 amyE::spec(PHAT-mNeonGreen-recA lacIQQ)	CW483	pCW460	This study	S3A
CW731	trpC2 ∆6 amyE::spec(PHAT-mNeonGreen-addA lacIQQ)	CW483	pCW471	This study	S12A
CW732	trpC2 ∆6 amyE::spec(PHAT-mNeonGreen-addB lacIQQ)	CW483	pCW472	This study
CW922	trpC2 ∆6 aprE::cat(PVEG-sgRNA+90deg-antisense)	CW483	pCW478	This study
CW923	trpC2 ∆6 aprE::cat(PVEG-sgRNA-90deg-sense)	CW483	pCW479	This study	S1A, S1B
CW1039	trpC2 ∆6 aprE::cat(PVEG-sgRNA-45deg-sense)	CW483	pCW510	This study
CW1182	trpC2 ∆6 ∆addA::kan	CW483	pCW574	This study	3B
CW1183	trpC2 ∆6 ∆addB::kan	CW483	pCW573	This study	3B
CW1184	trpC2 ∆6 ∆addAB::kan	CW483	pCW575	This study
CW1186	trpC2 ∆6 ganA::zeo(xylR PXYL-cas9D10A)	CW529	pCW577	This study	S1C
CW1187	trpC2 ∆6 ganA::zeo(xylR PXYL-cas9H840A)	CW490	pCW578	This study
CW1188	trpC2 ∆6 ganA::zeo(xylR PXYL-cas9D10A-H840A)	CW541	pCW605	This study
CW1201	trpC2 ∆6 ganA::zeo(xylR PXYL-cas9D10A-H840A)	CW541	pCW605	This study
CW1204	trpC2 ∆6 ganA::zeo(xylR PXYL-cas9D10A-ssrA)	CW529	pCW608	This study
CW1213	trpC2 ∆6 ∆recJ::erm	CW483	pCW640	This study
CW1223	trpC2 ∆6 ganA::zeo(xylR PXYL-cas9D10A) aprE::cat(PVEG-sgRNA+90deg-antisense)	CW1186	CW922	This study	1C, 1D
CW1224	trpC2 ∆6 ganA::zeo(xylR PXYL-cas9D10A) aprE::cat(PVEG-sgRNA-90deg-sense)	CW1186	CW923	This study	1C, 1D, 2B, 2C, 2D, 2E, 2F, S1A, S1B, S1C, S4, S5B
CW1229	trpC2 ∆6 ganA::zeo(xylR PXYL-cas9D10A-H840A) aprE::cat(PVEG-sgRNA+90deg-antisense)	CW1188	CW922	This study	1C, 1D, S1D
CW1230	trpC2 ∆6 ganA::zeo(xylR PXYL-cas9D10A-H840A) aprE::cat(PVEG-sgRNA-90deg-sense)	CW1188	CW923	This study	1C, 1D, 2B, 2C, 2D, 2E, 2F, S1A, S1B, S1D, S4, S5B
CW1236	trpC2 ∆6 ganA::zeo(xylR PXYL-cas9H840A) aprE::cat(PVEG-sgRNA-90deg-sense)	CW1187	CW923	This study	S1A, S1B
CW1292	trpC2 ∆6 aprE::cat(PXYL-sgRNA-90deg-sense)	CW483	pCW672	This study
CW1320	trpC2 ∆6 aprE::cat(PXYL-sgRNA-90deg-sense) ganA::zeo(xylR PXYL-cas9D10A-ssrA)	CW1292	CW1204	This study	2H, 3A, 4A, 5D, 5F, 6C, S5B, S7A, S7B, S8A, S8B, S8C, S8D
CW1463	trpC2 ∆6 aprE::cat(PXYL-sgRNA-90deg-sense) ganA::zeo(xylR PXYL-cas9D10A-ssrA) ΔrecD2::kan	CW1320	BKK27480	This study	S8C
CW1466	trpC2 ∆6 aprE::cat(PXYL-sgRNA-90deg-sense) ganA::zeo(xylR PXYL-cas9D10A-ssrA) ΔrecG::kan	CW1320	BKK15870	This study	3A, 3B, 5A, S7A
CW1469	trpC2 ∆6 aprE::cat(PXYL-sgRNA-90deg-sense) ganA::zeo(xylR PXYL-cas9D10A-ssrA) ΔrecF::kan	CW1320	BKK00040	This study	3A, 3B, S7A, S8C
CW1472	trpC2 ∆6 aprE::cat(PXYL-sgRNA-90deg-sense) ganA::zeo(xylR PXYL-cas9D10A-ssrA) ΔrecR::kan	CW1320	BKK00210	This study	3A, 3B, S7A, S8C
CW1475	trpC2 ∆6 aprE::cat(PXYL-sgRNA-90deg-sense) ganA::zeo(xylR PXYL-cas9D10A-ssrA) ΔsbcF::kan	CW1320	BKK09910	This study	S8B
CW1478	trpC2 ∆6 aprE::cat(PXYL-sgRNA-90deg-sense) ganA::zeo(xylR PXYL-cas9D10A-ssrA) ΔsbcE::kan	CW1320	BKK09920	This study	S8B
CW1484	trpC2 ∆6 aprE::cat(PXYL-sgRNA-90deg-sense) ganA::zeo(xylR PXYL-cas9D10A-ssrA) ΔrecA::kan	CW1320	BKK16940	This study	3A, 3B, S7A
CW1487	trpC2 ∆6 aprE::cat(PXYL-sgRNA-90deg-sense) ganA::zeo(xylR PXYL-cas9D10A-ssrA) ΔrecU::kan	CW1320	BKK22310	This study	3A, 3B, S7A, S8D
CW1490	trpC2 ∆6 aprE::cat(PXYL-sgRNA-90deg-sense) ganA::zeo(xylR PXYL-cas9D10A-ssrA) ΔrecX::kan	CW1320	BKK08520	This study	S8C
CW1493	trpC2 ∆6 aprE::cat(PXYL-sgRNA-90deg-sense) ganA::zeo(xylR PXYL-cas9D10A-ssrA) ΔruvB::kan	CW1320	BKK27730	This study	S8D
CW1496	trpC2 ∆6 aprE::cat(PXYL-sgRNA-90deg-sense) ganA::zeo(xylR PXYL-cas9D10A-ssrA) ΔruvA::kan	CW1320	BKK27740	This study	S8D
CW1499	trpC2 ∆6 aprE::cat(PXYL-sgRNA-90deg-sense) ganA::zeo(xylR PXYL-cas9D10A-ssrA) ΔaddAB::kan	CW1320	CW1184	This study	5F
CW1502	trpC2 ∆6 aprE::cat(PXYL-sgRNA-90deg-sense) ganA::zeo(xylR PXYL-cas9D10A-ssrA) ΔrecN::kan	CW1320	BKK24240	This study	S8B
CW1508	trpC2 ∆6 aprE::cat(PXYL-sgRNA-90deg-sense) ganA::zeo(xylR PXYL-cas9D10A-ssrA) ΔsbcC::kan	CW1320	BKK10650	This study	S8B
CW1511	trpC2 ∆6 aprE::cat(PXYL-sgRNA-90deg-sense) ganA::zeo(xylR PXYL-cas9D10A-ssrA) ΔsbcD::kan	CW1320	BKK10640	This study	S8B
CW1512	trpC2 ∆6 aprE::cat(PXYL-sgRNA-90deg-sense) ganA::zeo(xylR PXYL-cas9D10A-ssrA) ΔrecO::kan	CW1320	BKK25280	This study	3A, 3B, S7A, S8C
CW1526	trpC2 ∆6 aprE::cat(PXYL-sgRNA-90deg-sense) ganA::zeo(xylR PXYL-cas9D10A-ssrA) ΔaddA::kan	CW1320	CW1182	This study	3A, 3B, 5D, S7A, S8A
CW1530	trpC2 ∆6 aprE::cat(PXYL-sgRNA-90deg-sense) ganA::zeo(xylR PXYL-cas9D10A-ssrA) ΔaddB::kan	CW1320	CW1183	This study	3A, 3B, 5D, S7A, S8A
CW1536	trpC2 ∆6 aprE::cat(PXYL-sgRNA-90deg-sense) ganA::zeo(xylR PXYL-cas9D10A-ssrA) ΔrecJ::erm	CW1320	CW1213	This study	S8A
CW1537	trpC2 ∆6 aprE::cat(PXYL-sgRNA-90deg-sense) ganA::zeo(xylR PXYL-cas9D10A-ssrA) ΔrecQ::erm	CW1320	BKE19220	This study	S8A
CW1543	trpC2 ∆6 aprE::cat(PXYL-sgRNA-90deg-sense) ganA::zeo(xylR PXYL-cas9D10A-ssrA) ΔrecJ::erm ΔrecQ::kan	CW1536	BKK19220	This study	S8A
CW1547	trpC2 ∆6 aprE::cat(PXYL-sgRNA-90deg-sense) ganA::zeo(xylR PXYL-cas9D10A-ssrA) ΔrecJ::erm ΔrecS::kan	CW1536	BKK23020	This study	S8A
CW1555	trpC2 ∆6 aprE::cat(PXYL-sgRNA-90deg-sense) ganA::zeo(xylR PXYL-cas9D10A-ssrA) ΔrecQ::erm ΔrecS::kan	CW1537	BKK23020	This study	S8A
CW1585	trpC2 ∆6 ΔrecA::kan	CW483	BKK16940	This study	3B
CW1586	trpC2 ∆6 ΔrecF::kan	CW483	BKK00040	This study	3B
CW1587	trpC2 ∆6 ΔrecO::kan	CW483	BKK25280	This study	3B
CW1588	trpC2 ∆6 ΔrecR::kan	CW483	BKK00210	This study	3B
CW1589	trpC2 ∆6 ΔrecG::kan	CW483	BKK15870	This study	3B, 5A
CW1590	trpC2 ∆6 ΔrecU::kan	CW483	BKK22310	This study	3B
CW1593	trpC2 ∆6 ΔruvAB::kan	CW483	pCW720	This study
CW1596	trpC2 ∆6 aprE::cat(PVEG-sgRNA-135deg-sense)	CW483	pCW717	This study
CW1600	trpC2 ∆6 amyE::spec(PHAT-15xHis-ssbA lacIQQ)	CW483	pCW715	This study
CW1605	trpC2 ∆6 aprE::cat(PXYL-sgRNA-90deg-sense) ganA::zeo(xylR PXYL-cas9D10A-ssrA) ∆ruvAB::kan	CW1320	CW1593	This study	S8D
CW1610	trpC2 ∆6 ∆sbcEF::kan	CW483	pCW702	This study
CW1629	trpC2 ∆6 aprE::cat(PXYL-sgRNA-90deg-sense) ganA::zeo(xylR PXYL-cas9D10A-ssrA) ∆sbcEF::kan	CW1320	CW1610	This study	S8B
CW1638	trpC2 ∆6 amyE::spec(PHAT-15xHis-ssbA lacIQQ) ∆ssbA::tet	CW1600	pCW732	This study
CW1655	trpC2 ∆6 amyE::spec(PHAT-ssbA lacIQQ)	CW483	pCW734	This study	S9D, S9E
CW1659	trpC2 ∆6 amyE::spec(PHAT-ssbAΔCTT lacIQQ)	CW483	pCW736	This study	S9D, S9E
CW1661	trpC2 ∆6 aprE::cat(PXYL-sgRNA-90deg-sense) ganA::zeo(xylR PXYL-cas9D10A-ssrA) amyE::spec(PHAT-ssbA lacIQQ)	CW1320	pCW734	This study
CW1665	trpC2 ∆6 aprE::cat(PXYL-sgRNA-90deg-sense) ganA::zeo(xylR PXYL-cas9D10A-ssrA) amyE::spec(PHAT-ssbAΔCTT lacIQQ)	CW1320	pCW736	This study
CW1667	trpC2 ∆6 aprE::cat(PVEG-sgRNA-45deg-sense) ganA::zeo(xylR PXYL-cas9D10A)	CW1039	CW1186	This study	S1C
CW1676	trpC2 ∆6 aprE::cat(PXYL-sgRNA-90deg-sense) ganA::zeo(xylR PXYL-cas9D10A-ssrA) amyE::spec(PHAT-ssbA lacIQQ) ∆ssbA::tet	CW1661	CW1638	This study	4C, 4D
CW1680	trpC2 ∆6 aprE::cat(PXYL-sgRNA-90deg-sense) ganA::zeo(xylR PXYL-cas9D10A-ssrA) amyE::spec(PHAT-ssbAΔCTT lacIQQ) ∆ssbA::tet	CW1665	CW1638	This study	4C, 4D
CW1687	trpC2 ∆6 amyE::spec(PHAT-ssbA lacIQQ) ∆ssbA::tet	CW1655	CW1638	This study	S9D, S9E
CW1689	trpC2 ∆6 amyE::spec(PHAT-ssbAΔCTT lacIQQ) ∆ssbA::tet	CW1659	CW1638	This study	S9D, S9E
CW1691	trpC2 ∆6 aprE::cat(PVEG-sgRNA+90deg-sense)	CW483	pCW758	This study
CW1692	trpC2 ∆6 aprE::cat(PXYL-sgRNA-90deg-antisense)	CW483	pCW759	This study
CW1693	trpC2 ∆6 aprE::cat(PVEG-sgRNA-90deg-antisense)	CW483	pCW760	This study
CW1698	trpC2 ∆6 aprE::cat(PXYL-sgRNA-90deg-sense) ganA::zeo(xylR PXYL-cas9D10A-ssrA) amyE::spec(PHAT-mNeonGreen-addA lacIQQ)	CW1320	CW731	This study	5C
CW1699	trpC2 ∆6 aprE::cat(PXYL-sgRNA-90deg-sense) ganA::zeo(xylR PXYL-cas9D10A-ssrA) amyE::spec(PHAT-mNeonGreen-addB lacIQQ)	CW1320	CW732	This study	5C
CW1707	trpC2 ∆6 aprE::cat(PVEG-sgRNA+90deg-sense) ganA::zeo(xylR PXYL-cas9D10A)	CW1691	CW1186	This study	1C, 1D
CW1709	trpC2 ∆6 aprE::cat(PVEG-sgRNA-90deg-antisense) ganA::zeo(xylR PXYL-cas9D10A)	CW1693	CW1186	This study	1C, 1D, 2B, 2C, 2D, 2E, 2F, S1C, S4, S5B
CW1712	trpC2 ∆6 aprE::cat(PXYL-sgRNA-90deg-antisense) ganA::zeo(xylR PXYL-cas9D10A-ssrA)	CW1692	CW1204	This study	2H, 3A, 4A, 5D, 5F, 6C, S5B, S7A, S7B, S8A, S8B, S8C, S8D
CW1715	trpC2 ∆6 aprE::cat(PXYL-sgRNA-90deg-sense) ganA::zeo(xylR PXYL-cas9D10A-ssrA) amyE::spec(PHAT-RBS+10-priA-ssrA-lacIQQ)	CW1320	CW423	This study	2J, 2K, S6D
CW1721	trpC2 ∆6 aprE::cat(PVEG-sgRNA+90deg-sense) ganA::zeo(xylR PXYL-cas9D10A-H840A)	CW1691	CW1201	This study	1C, 1D, S1D
CW1722	trpC2 ∆6 aprE::cat(PVEG-sgRNA-90deg-antisense) ganA::zeo(xylR PXYL-cas9D10A-H840A)	CW1693	CW1201	This study	1C, 1D, 2B, 2C, 2D, 2E, 2F, S1D, S4, S5B
CW1723	trpC2 ∆6 aprE::cat(PXYL-sgRNA-90deg-antisense) ganA::zeo(xylR PXYL-cas9D10A-ssrA) ∆sbcC::kan	CW1712	BKK10650	This study	S8B
CW1724	trpC2 ∆6 aprE::cat(PXYL-sgRNA-90deg-antisense) ganA::zeo(xylR PXYL-cas9D10A-ssrA) ∆sbcD::kan	CW1712	BKK10640	This study	S8B
CW1725	trpC2 ∆6 aprE::cat(PXYL-sgRNA-90deg-antisense) ganA::zeo(xylR PXYL-cas9D10A-ssrA) ∆sbcEF::kan	CW1712	CW1610	This study	S8B
CW1726	trpC2 ∆6 aprE::cat(PXYL-sgRNA-90deg-antisense) ganA::zeo(xylR PXYL-cas9D10A-ssrA) ∆addA::kan	CW1712	CW1182	This study	3A, 3B, 5D, S7A, S8A
CW1727	trpC2 ∆6 aprE::cat(PXYL-sgRNA-90deg-antisense) ganA::zeo(xylR PXYL-cas9D10A-ssrA) ∆addB::kan	CW1712	CW1183	This study	3A, 3B, 5D, S7A, S8A
CW1728	trpC2 ∆6 aprE::cat(PXYL-sgRNA-90deg-antisense) ganA::zeo(xylR PXYL-cas9D10A-ssrA) ∆recG::kan	CW1712	BKK15870	This study	3A, 3B, 5A, S7A
CW1729	trpC2 ∆6 aprE::cat(PXYL-sgRNA-90deg-antisense) ganA::zeo(xylR PXYL-cas9D10A-ssrA) ∆recF::kan	CW1712	BKK00040	This study	3A, 3B, S7A, S8C
CW1730	trpC2 ∆6 aprE::cat(PXYL-sgRNA-90deg-antisense) ganA::zeo(xylR PXYL-cas9D10A-ssrA) ∆recO::kan	CW1712	BKK25280	This study	3A, 3B, S7A, S8C
CW1731	trpC2 ∆6 aprE::cat(PXYL-sgRNA-90deg-antisense) ganA::zeo(xylR PXYL-cas9D10A-ssrA) ∆recR::kan	CW1712	BKK00210	This study	3A, 3B, S7A, S8C
CW1732	trpC2 ∆6 aprE::cat(PXYL-sgRNA-90deg-antisense) ganA::zeo(xylR PXYL-cas9D10A-ssrA) ∆recJ::erm	CW1712	CW1213	This study	S8A
CW1733	trpC2 ∆6 aprE::cat(PXYL-sgRNA-90deg-antisense) ganA::zeo(xylR PXYL-cas9D10A-ssrA) ∆recQ::erm	CW1712	BKE19220	This study	S8A
CW1734	trpC2 ∆6 aprE::cat(PXYL-sgRNA-90deg-antisense) ganA::zeo(xylR PXYL-cas9D10A-ssrA) ∆recN::kan	CW1712	BKK24240	This study	S8B
CW1735	trpC2 ∆6 aprE::cat(PXYL-sgRNA-90deg-antisense) ganA::zeo(xylR PXYL-cas9D10A-ssrA) ∆ruvAB::kan	CW1712	CW1593	This study	S8D
CW1736	trpC2 ∆6 aprE::cat(PXYL-sgRNA-90deg-antisense) ganA::zeo(xylR PXYL-cas9D10A-ssrA) ∆recU::kan	CW1712	BKK22310	This study	3A, 3B, S7A, S8D
CW1737	trpC2 ∆6 aprE::cat(PXYL-sgRNA-90deg-antisense) ganA::zeo(xylR PXYL-cas9D10A-ssrA) ∆recA::kan	CW1712	BKK16940	This study	3A, 3B, S7A
CW1746	trpC2 ∆6 ywoCD::erm(PVEG-6xHis-recO)	CW483	pCW777	This study
CW1750	trpC2 ∆6 ywoCD::erm(PVEG-6xHis-recA)	CW483	pCW781	This study
CW1752	trpC2 ∆6 ywoCD::erm(PVEG-6xHis-recG)	CW483	pCW783	This study
CW1754	trpC2 ∆6 ywoCD::erm(PVEG-6xHis-recR)	CW483	pCW785	This study
CW1758	trpC2 ∆6 aprE::cat(PXYL-sgRNA-90deg-antisense) ganA::zeo(xylR PXYL-cas9D10A-ssrA) ∆recJ::erm ∆recQ::kan	CW1732	BKK19220	This study	S8A
CW1759	trpC2 ∆6 aprE::cat(PXYL-sgRNA-90deg-antisense) ganA::zeo(xylR PXYL-cas9D10A-ssrA) ∆recJ::erm ∆recS::kan	CW1732	BKK23020	This study	S8A
CW1760	trpC2 ∆6 aprE::cat(PXYL-sgRNA-90deg-antisense) ganA::zeo(xylR PXYL-cas9D10A-ssrA) ∆recQ::erm ∆recS::kan	CW1733	BKK23020	This study	S8A
CW1762	trpC2 ∆6 aprE::cat(PXYL-sgRNA-90deg-antisense) ganA::zeo(xylR PXYL-cas9D10A-ssrA) amyE::spec(PHAT-ssbA lacIQQ)	CW1712	pCW734	This study
CW1763	trpC2 ∆6 aprE::cat(PXYL-sgRNA-90deg-antisense) ganA::zeo(xylR PXYL-cas9D10A-ssrA) amyE::spec(PHAT-ssbA∆CTT lacIQQ)	CW1712	pCW736	This study
CW1773	trpC2 ∆6 aprE::cat(PXYL-sgRNA-90deg-antisense) ganA::zeo(xylR PXYL-cas9D10A-ssrA) ywoCD::erm(PVEG-6xHis-recO)	CW1712	CW1746	This study
CW1774	trpC2 ∆6 aprE::cat(PXYL-sgRNA-90deg-antisense) ganA::zeo(xylR PXYL-cas9D10A-ssrA) ywoCD::erm(PVEG-6xHis-recA)	CW1712	CW1750	This study	4B, 4F
CW1776	trpC2 ∆6 aprE::cat(PXYL-sgRNA-90deg-antisense) ganA::zeo(xylR PXYL-cas9D10A-ssrA) ywoCD::erm(PVEG-6xHis-recR)	CW1712	CW1754	This study
CW1778	trpC2 ∆6 aprE::cat(PXYL-sgRNA-90deg-sense) ganA::zeo(xylR PXYL-cas9D10A-ssrA) ywoCD::erm(PVEG-6xHis-recA)	CW1320	CW1750	This study	4B, 4F
CW1779	trpC2 ∆6 aprE::cat(PXYL-sgRNA-90deg-sense) ganA::zeo(xylR PXYL-cas9D10A-ssrA) ywoCD::erm(PVEG-6xHis-recG)	CW1320	CW1752	This study
CW1780	trpC2 ∆6 aprE::cat(PXYL-sgRNA-90deg-sense) ganA::zeo(xylR PXYL-cas9D10A-ssrA) ywoCD::erm(PVEG-6xHis-recR)	CW1320	CW1754	This study
CW1785	trpC2 ∆6 aprE::cat(PXYL-sgRNA-90deg-antisense) ganA::zeo(xylR PXYL-cas9D10A-ssrA) amyE::spec(PHAT-ssbA lacIQQ) ∆ssbA::tet	CW1762	CW1638	This study	4C, 4D
CW1786	trpC2 ∆6 aprE::cat(PXYL-sgRNA-90deg-antisense) ganA::zeo(xylR PXYL-cas9D10A-ssrA) amyE::spec(PHAT-ssbA∆CTT lacIQQ) ∆ssbA::tet	CW1763	CW1638	This study	4C, 4D
CW1800	trpC2 ∆6 aprE::cat(PXYL-sgRNA-90deg-antisense) ganA::zeo(xylR PXYL-cas9D10A-ssrA) amyE::spec(PHAT-RBS+10-priA-ssrA-lacIQQ)	CW1712	CW423	This study	2J, 2K, S6D
CW1803	trpC2 ∆6 aprE::cat(PXYL-sgRNA-90deg-antisense) ganA::zeo(xylR PXYL-cas9D10A-ssrA) ywoCD::erm(PVEG-6xHis-recA) ∆recF::kan	CW1774	BKK00040	This study	4B, 4F
CW1804	trpC2 ∆6 aprE::cat(PXYL-sgRNA-90deg-antisense) ganA::zeo(xylR PXYL-cas9D10A-ssrA) ywoCD::erm(PVEG-6xHis-recA) ∆recA::kan	CW1774	BKK16940	This study	S7B
CW1805	trpC2 ∆6 aprE::cat(PXYL-sgRNA-90deg-sense) ganA::zeo(xylR PXYL-cas9D10A-ssrA) ywoCD::erm(PVEG-6xHis-recA) ∆recF::kan	CW1778	BKK00040	This study	4B, 4F
CW1806	trpC2 ∆6 aprE::cat(PXYL-sgRNA-90deg-sense) ganA::zeo(xylR PXYL-cas9D10A-ssrA) ywoCD::erm(PVEG-6xHis-recA) ∆recA::kan	CW1778	BKK16940	This study	S7B
CW1808	trpC2 ∆6 aprE::cat(PXYL-sgRNA-90deg-antisense) ganA::zeo(xylR PXYL-cas9D10A-ssrA) ywoCD::erm(PVEG-6xHis-recR) ∆recR::kan	CW1776	BKK00210	This study	S7B
CW1811	trpC2 ∆6 aprE::cat(PXYL-sgRNA-90deg-sense) ganA::zeo(xylR PXYL-cas9D10A-ssrA) ywoCD::erm(PVEG-6xHis-recR) ∆recR::kan	CW1780	BKK00210	This study	S7B
CW1813	trpC2 ∆6 aprE::cat(PXYL-sgRNA-90deg-sense) ganA::zeo(xylR PXYL-cas9D10A-ssrA) amyE::spec(PHAT-ssbA lacIQQ) ∆ssbA::tet ywoCD::erm(PVEG-6xHis-recO)	CW1676	CW1746	This study	4E
CW1814	trpC2 ∆6 aprE::cat(PXYL-sgRNA-90deg-sense) ganA::zeo(xylR PXYL-cas9D10A-ssrA) amyE::spec(PHAT-ssbA lacIQQ) ∆ssbA::tet ywoCD::erm(PVEG-6xHis-recA)	CW1676	CW1750	This study	4E
CW1817	trpC2 ∆6 aprE::cat(PXYL-sgRNA-90deg-antisense) ganA::zeo(xylR PXYL-cas9D10A-ssrA) amyE::spec(PHAT-ssbA lacIQQ) ∆ssbA::tet ywoCD::erm(PVEG-6xHis-recO)	CW1785	CW1746	This study	4E
CW1818	trpC2 ∆6 aprE::cat(PXYL-sgRNA-90deg-antisense) ganA::zeo(xylR PXYL-cas9D10A-ssrA) amyE::spec(PHAT-ssbA lacIQQ) ∆ssbA::tet ywoCD::erm(PVEG-6xHis-recA)	CW1785	CW1750	This study	4E
CW1834	trpC2 ∆6 aprE::cat(PXYL-sgRNA-90deg-antisense) ganA::zeo(xylR PXYL-cas9D10A-ssrA) ywoCD::erm(PVEG-6xHis-recA) ∆addB::kan	CW1774	CW1183	This study	4B, 4F
CW1835	trpC2 ∆6 aprE::cat(PXYL-sgRNA-90deg-antisense) ganA::zeo(xylR PXYL-cas9D10A-ssrA) ywoCD::erm(PVEG-6xHis-recA) ∆recO::kan	CW1774	BKK25280	This study	4B, 4F
CW1836	trpC2 ∆6 aprE::cat(PXYL-sgRNA-90deg-antisense) ganA::zeo(xylR PXYL-cas9D10A-ssrA) ywoCD::erm(PVEG-6xHis-recA) ∆recR::kan	CW1774	BKK00210	This study	4B, 4F
CW1837	trpC2 ∆6 aprE::cat(PXYL-sgRNA-90deg-sense) ganA::zeo(xylR PXYL-cas9D10A-ssrA) ywoCD::erm(PVEG-6xHis-recA) ∆recO::kan	CW1778	BKK25280	This study	4B, 4F
CW1838	trpC2 ∆6 aprE::cat(PXYL-sgRNA-90deg-sense) ganA::zeo(xylR PXYL-cas9D10A-ssrA) ywoCD::erm(PVEG-6xHis-recA) ∆recR::kan	CW1778	BKK00210	This study	4B, 4F
CW1839	trpC2 ∆6 aprE::cat(PXYL-sgRNA-90deg-antisense) ganA::zeo(xylR PXYL-cas9D10A-ssrA) ywoCD::erm(PVEG-6xHis-recA) ∆recG::kan	CW1774	BKK15870	This study	4B, 4F
CW1840	trpC2 ∆6 aprE::cat(PXYL-sgRNA-90deg-antisense) ganA::zeo(xylR PXYL-cas9D10A-ssrA) ywoCD::erm(PVEG-6xHis-recA) ∆recU::kan	CW1774	BKK22310	This study	4B, 4F
CW1841	trpC2 ∆6 aprE::cat(PXYL-sgRNA-90deg-sense) ganA::zeo(xylR PXYL-cas9D10A-ssrA) ywoCD::erm(PVEG-6xHis-recA) ∆recG::kan	CW1778	BKK15870	This study	4B, 4F
CW1842	trpC2 ∆6 aprE::cat(PXYL-sgRNA-90deg-sense) ganA::zeo(xylR PXYL-cas9D10A-ssrA) ywoCD::erm(PVEG-6xHis-recA) ∆recU::kan	CW1778	BKK22310	This study	4B, 4F
CW1843	trpC2 ∆6 aprE::cat(PXYL-sgRNA-90deg-antisense) ganA::zeo(xylR PXYL-cas9D10A-ssrA) ywoCD::erm(PVEG-6xHis-recO) ∆recO::kan	CW1773	BKK25280	This study	S7B
CW1846	trpC2 ∆6 aprE::cat(PXYL-sgRNA-90deg-sense) ganA::zeo(xylR PXYL-cas9D10A-ssrA) ywoCD::erm(PVEG-6xHis-recG) ∆recG::kan	CW1779	BKK15870	This study	S7B
CW1848	trpC2 ∆6 aprE::cat(PXYL-sgRNA-90deg-sense) ganA::zeo(xylR PXYL-cas9D10A-ssrA) amyE::spec(PHAT-6xHis-recF lacIQQ)	CW1320	pCW766	This study
CW1849	trpC2 ∆6 aprE::cat(PXYL-sgRNA-90deg-antisense) ganA::zeo(xylR PXYL-cas9D10A-ssrA) amyE::spec(PHAT-6xHis-recF lacIQQ)	CW1712	pCW766	This study
CW1850	trpC2 ∆6 aprE::cat(PXYL-sgRNA-90deg-antisense) ganA::zeo(xylR PXYL-cas9D10A-ssrA) ywoCD::erm(PVEG-6xHis-recA) ∆addA::kan	CW1774	CW1182	This study	4B, 4F
CW1851	trpC2 ∆6 aprE::cat(PXYL-sgRNA-90deg-sense) ganA::zeo(xylR PXYL-cas9D10A-ssrA) ywoCD::erm(PVEG-6xHis-recA) ∆addA::kan	CW1778	CW1182	This study	4B, 4F
CW1852	trpC2 ∆6 aprE::cat(PXYL-sgRNA-90deg-sense) ganA::zeo(xylR PXYL-cas9D10A-ssrA) ywoCD::erm(PVEG-6xHis-recA) ∆addB::kan	CW1778	CW1183	This study	4B, 4F
CW1853	trpC2 ∆6 aprE::cat(PXYL-sgRNA-90deg-sense) ganA::zeo(xylR PXYL-cas9D10A-ssrA) amyE::spec(PHAT-ssbAΔCTT lacIQQ) ∆ssbA::tet ywoCD::erm(PVEG-6xHis-recO)	CW1680	CW1746	This study	4E
CW1854	trpC2 ∆6 aprE::cat(PXYL-sgRNA-90deg-sense) ganA::zeo(xylR PXYL-cas9D10A-ssrA) amyE::spec(PHAT-ssbAΔCTT lacIQQ) ∆ssbA::tet ywoCD::erm(PVEG-6xHis-recA)	CW1680	CW1750	This study	4E
CW1856	trpC2 ∆6 aprE::cat(PXYL-sgRNA-90deg-antisense) ganA::zeo(xylR PXYL-cas9D10A-ssrA) amyE::spec(PHAT-ssbAΔCTT lacIQQ) ∆ssbA::tet ywoCD::erm(PVEG-6xHis-recO)	CW1786	CW1746	This study	4E
CW1857	trpC2 ∆6 aprE::cat(PXYL-sgRNA-90deg-antisense) ganA::zeo(xylR PXYL-cas9D10A-ssrA) amyE::spec(PHAT-ssbAΔCTT lacIQQ) ∆ssbA::tet ywoCD::erm(PVEG-6xHis-recA)	CW1786	CW1750	This study	4E
CW1871	trpC2 ∆6 aprE::cat(PXYL-sgRNA-90deg-sense) ganA::zeo(xylR PXYL-cas9D10A-ssrA) amyE::spec(PHAT-6xHis-recF lacIQQ) ∆recF::kan	CW1848	BKK00040	This study	S7B
CW1872	trpC2 ∆6 aprE::cat(PXYL-sgRNA-90deg-antisense) ganA::zeo(xylR PXYL-cas9D10A-ssrA) amyE::spec(PHAT-6xHis-recF lacIQQ) ∆recF::kan	CW1849	BKK00040	This study	S7B
CW1881	trpC2 ∆6 addBD961A::kan	CW483	pCW802	This study
CW1882	trpC2 ∆6 addAD1172A::kan	CW483	pCW803	This study
CW1883	trpC2 ∆6 ywoCD::erm(PVEG-6xHis-priAG538D)	CW483	pCW779	This study
CW1886	trpC2 ∆6 aprE::cat(PXYL-sgRNA-90deg-sense) ganA::zeo(xylR PXYL-cas9D10A-ssrA) addBD961A::kan	CW1320	CW1881	This study	5D, 5F, S12C
CW1887	trpC2 ∆6 aprE::cat(PXYL-sgRNA-90deg-sense) ganA::zeo(xylR PXYL-cas9D10A-ssrA) addAD1172A::kan	CW1320	CW1882	This study	5D, 5F, S12C
CW1888	trpC2 ∆6 aprE::cat(PXYL-sgRNA-90deg-antisense) ganA::zeo(xylR PXYL-cas9D10A-ssrA) addBD961A::kan	CW1712	CW1881	This study	5D, 5F, S12B
CW1889	trpC2 ∆6 aprE::cat(PXYL-sgRNA-90deg-antisense) ganA::zeo(xylR PXYL-cas9D10A-ssrA) addAD1172A::kan	CW1712	CW1882	This study	5D, 5F, S12B
CW1890	trpC2 ∆6 addAK36A::kan	CW483	pCW804	This study
CW1894	trpC2 ∆6 ywoCD::erm(PVEG-6xHis-priAG538D) ∆priA::kan	CW1883	pCW809	This study
CW1902	trpC2 ∆6 aprE::cat(PXYL-sgRNA-90deg-sense) ganA::zeo(xylR PXYL-cas9D10A-ssrA) addAK36A::kan	CW1320	CW1890	This study	5D, 5E, 5F, S12C
CW1903	trpC2 ∆6 aprE::cat(PXYL-sgRNA-90deg-antisense) ganA::zeo(xylR PXYL-cas9D10A-ssrA) addAK36A::kan	CW1712	CW1890	This study	5D, 5E, 5F, S12B
CW1908	trpC2 ∆6 aprE::cat(PXYL-sgRNA-90deg-antisense) ganA::zeo(xylR PXYL-cas9D10A-ssrA) amyE::spec(PHAT-RBS+10-priA-ssrA-lacIQQ) ∆priA::kan	CW1800	CW1894	This study	2J, 2K, S6D
CW1909	trpC2 ∆6 aprE::cat(PXYL-sgRNA-90deg-sense) ganA::zeo(xylR PXYL-cas9D10A-ssrA) amyE::spec(PHAT-RBS+10-priA-ssrA-lacIQQ) ∆priA::kan	CW1715	CW1894	This study	2J, 2K, S6D
CW1952	trpC2 ∆6 ∆recG::erm	CW483	pCW834	This study
CW1990	trpC2 ∆6 aprE::cat(PXYL-sgRNA-90deg-sense) ganA::zeo(xylR PXYL-cas9D10A-ssrA) ∆recG::erm	CW1320	CW1952	This study	6C
CW1992	trpC2 ∆6 aprE::cat(PXYL-sgRNA-90deg-antisense) ganA::zeo(xylR PXYL-cas9D10A-ssrA) ∆recG::erm	CW1712	CW1952	This study	6C
CW2034	trpC2 ∆6 aprE::cat(PXYL-sgRNA-90deg-sense) ganA::zeo(xylR PXYL-cas9D10A-ssrA) ∆recG::erm addAD1172A::kan	CW1990	CW1882	This study	6C
CW2035	trpC2 ∆6 aprE::cat(PXYL-sgRNA-90deg-antisense) ganA::zeo(xylR PXYL-cas9D10A-ssrA) ∆recG::erm addAD1172A::kan	CW1992	CW1882	This study	6C
CW2038	trpC2 ∆6 aprE::cat(PXYL-sgRNA-90deg-sense) ganA::zeo(xylR PXYL-cas9D10A-ssrA) ∆recG::erm addBD961A::kan	CW1990	CW1881	This study	6C
CW2040	trpC2 ∆6 aprE::cat(PXYL-sgRNA-90deg-antisense) ganA::zeo(xylR PXYL-cas9D10A-ssrA) ∆recG::erm addBD961A::kan	CW1992	CW1881	This study	6C
CW2041	trpC2 ∆6 aprE::cat(PXYL-sgRNA-90deg-antisense) ganA::zeo(xylR PXYL-cas9D10A-ssrA) ∆addAB::kan	CW1712	CW1184	This study	5F
CW2045	trpC2 ∆6 (addBD961A-addAD682E-D1172A)::kan	CW483	pCW848	This study
CW2047	trpC2 ∆6 aprE::cat(PXYL-sgRNA-90deg-sense) ganA::zeo(xylR PXYL-cas9D10A-ssrA) (addBD961A-addAD682E-D1172A)::kan	CW1320	CW2045	This study	5D, 5E, 5F
CW2049	trpC2 ∆6 aprE::cat(PXYL-sgRNA-90deg-antisense) ganA::zeo(xylR PXYL-cas9D10A-ssrA) (addBD961A-addAD682E-D1172A)::kan	CW1712	CW2045	This study	5D, 5E, 5F
CW2067	trpC2 ∆6 aprE::cat(PXYL-sgRNA-90deg-antisense) ganA::zeo(xylR PXYL-cas9D10A-ssrA) amyE::spec(PHAT-mNeonGreen-addA lacIQQ)	CW1712	CW731	This study	5C
CW2068	trpC2 ∆6 aprE::cat(PXYL-sgRNA-90deg-antisense) ganA::zeo(xylR PXYL-cas9D10A-ssrA) amyE::spec(PHAT-mNeonGreen-addB lacIQQ)	CW1712	CW732	This study	5C
CW2078	trpC2 ∆6 amyE::spec(PHAT-RBS+10-priA-ssrA-lacIQQ)	CW483	pCW327	This study	S6B, S6C
CW2079	trpC2 ∆6 ganA::zeo(xylR PXYL-cas9D10A) aprE::cat(PVEG-sgRNA-135deg-sense)	CW1596	CW1186	This study	S1C
CW2081	trpC2 ∆6 aprE::cat(PXYL-sgRNA-90deg-antisense) ganA::zeo(xylR PXYL-cas9D10A-ssrA) amyE::spec(PHAT-mNeonGreen-addB lacIQQ) ∆addB::kan	CW2068	CW1183	This study	S7B
CW2082	trpC2 ∆6 aprE::cat(PXYL-sgRNA-90deg-sense) ganA::zeo(xylR PXYL-cas9D10A-ssrA) amyE::spec(PHAT-mNeonGreen-addB lacIQQ) ∆addB::kan	CW1699	CW1183	This study	S7B
CW2083	trpC2 ∆6 aprE::cat(PXYL-sgRNA-90deg-antisense) ganA::zeo(xylR PXYL-cas9D10A-ssrA) amyE::spec(PHAT-mNeonGreen-addA lacIQQ) ∆addA::kan	CW2067	CW1182	This study	S7B
CW2084	trpC2 ∆6 aprE::cat(PXYL-sgRNA-90deg-sense) ganA::zeo(xylR PXYL-cas9D10A-ssrA) amyE::spec(PHAT-mNeonGreen-addB lacIQQ) ∆addA::kan	CW1698	CW1182	This study	S7B
CW2085	trpC2 ∆6 aprE::cat(PXYL-sgRNA-90deg-antisense) ganA::zeo(xylR PXYL-cas9D10A-ssrA) ΔsbcF::kan	CW1712	BKK09910	This study	S8B
CW2086	trpC2 ∆6 aprE::cat(PXYL-sgRNA-90deg-antisense) ganA::zeo(xylR PXYL-cas9D10A-ssrA) ∆sbcE::kan	CW1712	BKK09920	This study	S8B
CW2087	trpC2 ∆6 aprE::cat(PXYL-sgRNA-90deg-antisense) ganA::zeo(xylR PXYL-cas9D10A-ssrA) ΔrecD2::kan	CW1712	BKK27480	This study	S8C
CW2088	trpC2 ∆6 aprE::cat(PXYL-sgRNA-90deg-antisense) ganA::zeo(xylR PXYL-cas9D10A-ssrA) ΔrecX::kan	CW1712	BKK08520	This study	S8C
CW2089	trpC2 ∆6 aprE::cat(PXYL-sgRNA-90deg-antisense) ganA::zeo(xylR PXYL-cas9D10A-ssrA) ΔruvA::kan	CW1712	BKK27740	This study	S8D
CW2090	trpC2 ∆6 aprE::cat(PXYL-sgRNA-90deg-antisense) ganA::zeo(xylR PXYL-cas9D10A-ssrA) ΔruvB::kan	CW1712	BKK27730	This study	S8D
CW2091	trpC2 ∆6 aprE::cat(PXYL-sgRNA-90deg-antisense) ganA::zeo(xylR PXYL-cas9D10A-ssrA) ΔrecS::kan	CW1712	BKK23020	This study	S8A
CW2093	trpC2 ∆6 aprE::cat(PXYL-sgRNA-90deg-sense) ganA::zeo(xylR PXYL-cas9D10A-ssrA) ΔrecS::kan	CW1320	BKK23020	This study	S8A
CW2095	trpC2 ∆6 aprE::cat(PVEG-sgRNA-45deg-antisense)	CW483	pCW855	This study
CW2097	trpC2 ∆6 aprE::cat(PVEG-sgRNA-135deg-antisense)	CW483	pCW857	This study
CW2103	trpC2 ∆6 aprE::cat(PVEG-sgRNA-45deg-antisense) ganA::zeo(xylR PXYL-cas9D10A)	CW2095	CW1186	This study	S1C
CW2105	trpC2 ∆6 aprE::cat(PVEG-sgRNA-135deg-antisense) ganA::zeo(xylR PXYL-cas9D10A)	CW2097	CW1186	This study	S1C
CW2107	trpC2 ∆6 amyE::spec(PHAT-mNeonGreen-addAK36A lacIQQ)	CW483	pCW850	This study	S12A
CW2108	trpC2 ∆6 amyE::spec(PHAT-RBS+10-priA-ssrA-lacIQQ) ΔpriA::cat(PVEG-bgaB)	CW2078	CW423	This study	S6B, S6C
CW2110	trpC2 ∆6 ΔrecU::erm	CW483	pCW854	This study
CW2111	trpC2 ∆6 ΔsbcCD::erm	CW483	pCW859	This study
CW2113	trpC2 ∆6 aprE::cat(PXYL-sgRNA-90deg-sense) ganA::zeo(xylR PXYL-cas9D10A-ssrA) ΔsbcCD::erm	CW1320	CW2111	This study	S8B
CW2114	trpC2 ∆6 aprE::cat(PXYL-sgRNA-90deg-antisense) ganA::zeo(xylR PXYL-cas9D10A-ssrA) ΔsbcCD::erm	CW1712	CW2111	This study	S8B
CW2115	trpC2 ∆6 aprE::cat(PXYL-sgRNA-90deg-sense) ganA::zeo(xylR PXYL-cas9D10A-ssrA) ΔrecO::kan ywoCD::erm(PVEG-6xHis-recO)	CW1512	CW1746	This study	S7B
CW2116	trpC2 ∆6 aprE::cat(PXYL-sgRNA-90deg-antisense) ganA::zeo(xylR PXYL-cas9D10A-ssrA) ∆recG::kan ywoCD::erm(PVEG-6xHis-recG)	CW1728	CW1752	This study	S7B
CW2117	trpC2 ∆6 aprE::cat(PXYL-sgRNA-90deg-antisense) ganA::zeo(xylR PXYL-cas9D10A-ssrA) ∆ruvAB::kan ΔrecU::erm	CW1735	CW2110	This study	S8D
CW2118	trpC2 ∆6 aprE::cat(PXYL-sgRNA-90deg-sense) ganA::zeo(xylR PXYL-cas9D10A-ssrA) ∆ruvAB::kan ΔrecU::erm	CW1605	CW2110	This study	S8D
CW2119	trpC2 ∆6 ganA::zeo(xylR PXYL-cas9D10A) aprE::cat(PVEG-sgRNA-90deg-sense) amyE::spec(PHAT-mNeonGreen-recA lacIQQ)	CW1224	CW720	This study	1E, 1F, S3B
CW2121	trpC2 ∆6 ganA::zeo(xylR PXYL-cas9D10A-H840A) aprE::cat(PVEG-sgRNA-90deg-sense) amyE::spec(PHAT-mNeonGreen-recA lacIQQ)	CW1230	CW720	This study	1E, 1F, S3B
CW2123	trpC2 ∆6 aprE::cat(PVEG-sgRNA-90deg-antisense) ganA::zeo(xylR PXYL-cas9D10A) amyE::spec(PHAT-mNeonGreen-recA lacIQQ)	CW1709	CW720	This study	1E, 1F, S3B
CW2125	trpC2 ∆6 aprE::cat(PVEG-sgRNA-90deg-antisense) ganA::zeo(xylR PXYL-cas9D10A-H840A) amyE::spec(PHAT-mNeonGreen-recA lacIQQ)	CW1722	CW720	This study	1E, 1F, S3B
HM715	trpC2			DOI: 10.1038/36786
