# Supplementary material for: Rescuing bacterial genome replication: essential functions to repair a double-strand break and restart DNA synthesis
Source: Research Square preprint supplement (doi:10.21203/rs.3.rs-6364374/v1), 2025-05-08
Supplement: Supplementary file 4 [file 77711eaa6302acbeea9a841c.xlsx]

## Sheet: Sheet1
Table S3. Recombinant DNA used in this study.
Plasmid	Genotype	Circular/linear	Reference	Sequence (5'→3')
pCW300	bla colE1 'amyE spc PHAT-priA lacIQQ amyE'	Circular	This study	ACTACTTACTCTAGCTTCCCGGCAACAATTAATAGACTGGATGGAGGCGGATAAAGTTGCAGGACCACTTCTGCGCTCGGCCCTTCCGGCTGGCTGGTTTATTGCTGATAAATCTGGAGCCGGTGAGCGTGGGTCTCGCGGTATCATTGCAGCACTGGGGCCAGATGGTAAGCCCTCCCGTATCGTAGTTATCTACACGACGGGGAGTCAGGCAACTATGGATGAACGAAATAGACAGATCGCTGAGATAGGTGCCTCACTGATTAAGCATTGGTAACTGTCAGACCAAGTTTACTCATATATACTTTAGATTGATTTAAAACTTCATTTTTAATTTAAAAGGATCTAGGTGAAGATCCTTTTTGATAATCTCATGACCAAAATCCCTTAACGTGAGTT…
pCW301	rop pMB1 bla 'coaBC PVEG-bgaB cat def fmt'	Circular	This study	GCCAGTTGTTTACCCTCACAACGTTCCAGTAACCGGGCATGTTCATCATCAGTAACCCGTATCGTGAGCATCCTCTCTCGTTTCATCGGTATCATTACCCCCATGAACAGAAATCCCCCTTACACGGAGGCATCAGTGACCAAACAGGAAAAAACCGCCCTTAACATGGCCCGCTTTATCAGAAGCCAGACATTAACGCTTCTGGAGAAACTCAACGAGCTGGACGCGGATGAACAGGCAGACATCTGTGAATCGCTTCACGACCACGCTGATGAGCTTTACCGCAGCTGCCTCGCGCGTTTCGGTGATGACGGTGAAAACCTCTGACACATGCAGCTCCCGGAGACGGTCACAGCTTGTCTGTAAGCGGATGCCGGGAGCAGACAAGCCCGTCAGGGC…
pCW327	bla colE1 'amyE spc PHAT-RBS+10-priA-ssrA lacIQQ amyE'	Circular	This study	ACTACTTACTCTAGCTTCCCGGCAACAATTAATAGACTGGATGGAGGCGGATAAAGTTGCAGGACCACTTCTGCGCTCGGCCCTTCCGGCTGGCTGGTTTATTGCTGATAAATCTGGAGCCGGTGAGCGTGGGTCTCGCGGTATCATTGCAGCACTGGGGCCAGATGGTAAGCCCTCCCGTATCGTAGTTATCTACACGACGGGGAGTCAGGCAACTATGGATGAACGAAATAGACAGATCGCTGAGATAGGTGCCTCACTGATTAAGCATTGGTAACTGTCAGACCAAGTTTACTCATATATACTTTAGATTGATTTAAAACTTCATTTTTAATTTAAAAGGATCTAGGTGAAGATCCTTTTTGATAATCTCATGACCAAAATCCCTTAACGTGAGTT…
pCW367	rop colE1 bla 'ganA xylR PXYL-cas9H840A erm ganA'	Circular	This study	ATCCTGATATTGTCTGCATTTGCGCCGGAGCAAACCAAAAACCTGGTGAGACACGCCTTGAATTAGTAGAAAAGAACTTGAAGATTTTCAAAGGCATCGTTAGTGAAGTCATGGCGAGCGGATTTGACGGCATTTTCTTAGTCGCGACGCGAGGCTGGATGGCCTTCCCCATTATGATTCTTCTCGCTTCCGGCGGCATCGGGATGCCCGCGTTGCAGGCCATGCTGTCCAGGCAGGTAGATGACGACCATCAGGGACAGCTTCAAGGATCGCTCGCGGCTCTTACCAGCCTAACTTCGATCACTGGACCGCTGATCGTCACGGCGATTTATGCCGCCTCGGCGAGCACATGGAACGGGTTGGCATGGATTGTAGGCGCCGCCCTATACCTTGTCTGCC…
pCW368	rop colE1 bla 'ganA xylR PXYL-cas9D10A erm ganA'	Circular	This study	ATCCTGATATTGTCTGCATTTGCGCCGGAGCAAACCAAAAACCTGGTGAGACACGCCTTGAATTAGTAGAAAAGAACTTGAAGATTTTCAAAGGCATCGTTAGTGAAGTCATGGCGAGCGGATTTGACGGCATTTTCTTAGTCGCGACGCGAGGCTGGATGGCCTTCCCCATTATGATTCTTCTCGCTTCCGGCGGCATCGGGATGCCCGCGTTGCAGGCCATGCTGTCCAGGCAGGTAGATGACGACCATCAGGGACAGCTTCAAGGATCGCTCGCGGCTCTTACCAGCCTAACTTCGATCACTGGACCGCTGATCGTCACGGCGATTTATGCCGCCTCGGCGAGCACATGGAACGGGTTGGCATGGATTGTAGGCGCCGCCCTATACCTTGTCTGCC…
pCW460	bla colE1 'amyE spc PHAT-mNeonGreen-recA lacIQQ amyE'	Circular	This study	ACTACTTACTCTAGCTTCCCGGCAACAATTAATAGACTGGATGGAGGCGGATAAAGTTGCAGGACCACTTCTGCGCTCGGCCCTTCCGGCTGGCTGGTTTATTGCTGATAAATCTGGAGCCGGTGAGCGTGGGTCTCGCGGTATCATTGCAGCACTGGGGCCAGATGGTAAGCCCTCCCGTATCGTAGTTATCTACACGACGGGGAGTCAGGCAACTATGGATGAACGAAATAGACAGATCGCTGAGATAGGTGCCTCACTGATTAAGCATTGGTAACTGTCAGACCAAGTTTACTCATATATACTTTAGATTGATTTAAAACTTCATTTTTAATTTAAAAGGATCTAGGTGAAGATCCTTTTTGATAATCTCATGACCAAAATCCCTTAACGTGAGTT…
pCW471	bla colE1 'amyE spc PHAT-mNeonGreen-addA lacIQQ amyE'	Circular	This study	ACTACTTACTCTAGCTTCCCGGCAACAATTAATAGACTGGATGGAGGCGGATAAAGTTGCAGGACCACTTCTGCGCTCGGCCCTTCCGGCTGGCTGGTTTATTGCTGATAAATCTGGAGCCGGTGAGCGTGGGTCTCGCGGTATCATTGCAGCACTGGGGCCAGATGGTAAGCCCTCCCGTATCGTAGTTATCTACACGACGGGGAGTCAGGCAACTATGGATGAACGAAATAGACAGATCGCTGAGATAGGTGCCTCACTGATTAAGCATTGGTAACTGTCAGACCAAGTTTACTCATATATACTTTAGATTGATTTAAAACTTCATTTTTAATTTAAAAGGATCTAGGTGAAGATCCTTTTTGATAATCTCATGACCAAAATCCCTTAACGTGAGTT…
pCW472	bla colE1 'amyE spc PHAT-mNeonGreen-addB lacIQQ amyE'	Circular	This study	ACTACTTACTCTAGCTTCCCGGCAACAATTAATAGACTGGATGGAGGCGGATAAAGTTGCAGGACCACTTCTGCGCTCGGCCCTTCCGGCTGGCTGGTTTATTGCTGATAAATCTGGAGCCGGTGAGCGTGGGTCTCGCGGTATCATTGCAGCACTGGGGCCAGATGGTAAGCCCTCCCGTATCGTAGTTATCTACACGACGGGGAGTCAGGCAACTATGGATGAACGAAATAGACAGATCGCTGAGATAGGTGCCTCACTGATTAAGCATTGGTAACTGTCAGACCAAGTTTACTCATATATACTTTAGATTGATTTAAAACTTCATTTTTAATTTAAAAGGATCTAGGTGAAGATCCTTTTTGATAATCTCATGACCAAAATCCCTTAACGTGAGTT…
pCW478	bla colE1 aprE' cat 'lacI PVEG-sgRNA+90deg-antisense 'aprE	Circular	This study	TTGAAGCATTTATCAGGGTTATTGTCTCATGAGCGGATACATATTTGAATGTATTTAGAAAAATAAACAAATAGGGGTTCCGCGCACATTTCCCCGAAAAGTGCCACCTGACGTCTAAGAAACCATTATTATCATGACATTAACCTATAAAAATAGGCGTATCACGAGGCCCTTTCGTCTTCAAGAATTGGCGAGAGATGATATACCTAAATAGAGATAAAATCATCTCAAAAAAATGGGTCTACTAAAATATTATTCCATCTATTACAATAAATTCACAGAATAGTCTTTTAAGTAAGTCTACTCTGAATTTTTTTAAAAGGAGAGGGTAAAGAGTGAGAAGCAAAAAATTGTGGATCAGCTTGTTGTTTGCGTTAACGTTAATCTTTACGATGGCGT…
pCW479	bla colE1 aprE' cat 'lacI PVEG-sgRNA-90deg-sense 'aprE	Circular	This study	TTGAAGCATTTATCAGGGTTATTGTCTCATGAGCGGATACATATTTGAATGTATTTAGAAAAATAAACAAATAGGGGTTCCGCGCACATTTCCCCGAAAAGTGCCACCTGACGTCTAAGAAACCATTATTATCATGACATTAACCTATAAAAATAGGCGTATCACGAGGCCCTTTCGTCTTCAAGAATTGGCGAGAGATGATATACCTAAATAGAGATAAAATCATCTCAAAAAAATGGGTCTACTAAAATATTATTCCATCTATTACAATAAATTCACAGAATAGTCTTTTAAGTAAGTCTACTCTGAATTTTTTTAAAAGGAGAGGGTAAAGAGTGAGAAGCAAAAAATTGTGGATCAGCTTGTTGTTTGCGTTAACGTTAATCTTTACGATGGCGT…
pCW510	bla colE1 aprE' cat 'lacI PVEG-sgRNA-45deg-sense 'aprE	Circular	This study	TTGAAGCATTTATCAGGGTTATTGTCTCATGAGCGGATACATATTTGAATGTATTTAGAAAAATAAACAAATAGGGGTTCCGCGCACATTTCCCCGAAAAGTGCCACCTGACGTCTAAGAAACCATTATTATCATGACATTAACCTATAAAAATAGGCGTATCACGAGGCCCTTTCGTCTTCAAGAATTGGCGAGAGATGATATACCTAAATAGAGATAAAATCATCTCAAAAAAATGGGTCTACTAAAATATTATTCCATCTATTACAATAAATTCACAGAATAGTCTTTTAAGTAAGTCTACTCTGAATTTTTTTAAAAGGAGAGGGTAAAGAGTGAGAAGCAAAAAATTGTGGATCAGCTTGTTGTTTGCGTTAACGTTAATCTTTACGATGGCGT…
pCW573	yhjQ yhjR kan addA sbcD'	Linear	This study	TTACGCTGCCATGCTGCGGCATTGTTCAGCACAGGTGAAGCAGGCTTTCGCACATGCTTGGCAATGATCATGATCGTGCTTTCCGCATTCAGTGCCGCATGCTTCACAAATATCGGCGCAAAGTGCACAAATTTCTTTCATAAACGGGCTGTCCGTTTGCATGGCTTTGACCGCCAGCGCGCAAATATCCGCGCATTCCCTGTCAAGCCGGATGCATCCGCTGAGATGATGCTGCACGCTTTCTTCCAAGCATTTAGTGAAACAATGATTGCAAGCCTTCATGCAATCGATGCAAGCCTCAATACAAGCCTCAGAATATTGCTCCATGGTTGATTCCCCCTGTATGACAGTATATGGTTTTATGTTTCACGGCTGCATTTGAAAAAAACAGGGGAGTGT…
pCW574	yhjQ yhjR addB kan sbcD'	Linear	This study	TTACGCTGCCATGCTGCGGCATTGTTCAGCACAGGTGAAGCAGGCTTTCGCACATGCTTGGCAATGATCATGATCGTGCTTTCCGCATTCAGTGCCGCATGCTTCACAAATATCGGCGCAAAGTGCACAAATTTCTTTCATAAACGGGCTGTCCGTTTGCATGGCTTTGACCGCCAGCGCGCAAATATCCGCGCATTCCCTGTCAAGCCGGATGCATCCGCTGAGATGATGCTGCACGCTTTCTTCCAAGCATTTAGTGAAACAATGATTGCAAGCCTTCATGCAATCGATGCAAGCCTCAATACAAGCCTCAGAATATTGCTCCATGGTTGATTCCCCCTGTATGACAGTATATGGTTTTATGTTTCACGGCTGCATTTGAAAAAAACAGGGGAGTGT…
pCW575	yhjQ yhjR kan sbcD'	Circular	This study	GCCAGTTGTTTACCCTCACAACGTTCCAGTAACCGGGCATGTTCATCATCAGTAACCCGTATCGTGAGCATCCTCTCTCGTTTCATCGGTATCATTACCCCCATGAACAGAAATCCCCCTTACACGGAGGCATCAGTGACCAAACAGGAAAAAACCGCCCTTAACATGGCCCGCTTTATCAGAAGCCAGACATTAACGCTTCTGGAGAAACTCAACGAGCTGGACGCGGATGAACAGGCAGACATCTGTGAATCGCTTCACGACCACGCTGATGAGCTTTACCGCAGCTGCCTCGCGCGTTTCGGTGATGACGGTGAAAACCTCTGACACATGCAGCTCCCGGAGACGGTCACAGCTTGTCTGTAAGCGGATGCCGGGAGCAGACAAGCCCGTCAGGGC…
pCW577	xylR' PXYL-cas9D10A zeo ganA' 'ganQ	Linear	This study	GAGAGTTGCCCTGGAGACAGGGGAGTTCTTCAAAATTTCATCTAATATTAATTTTTGATTCATTTTTTTTACTAAAGCTTGATCTGCAATTTGAATAATAACCACTCCTTTGTTTATCCACCGAACTAAGTTGGTGTTTTTTGAAGCTTGAATTAGATATTTAAAAGTATCATATCTAATATTATAACTAAATTTTCTAAAAAAAACATTGAAATAAACATTTATTTTGTATATGATGAGATAAAGTTAGTTTATTGGATAAACAAACTAACTCAATTAAGATAGTTGATGGATAAACTTGTTCACTTAAATCAAAGGGGGAAATGACAAATGGTCCAAACTAGTGATATCTAAAAATCAAAGGGGGAAATGGGATCCATGGATAAGAAATACTCAATA…
pCW578	xylR' PXYL-cas9H840A zeo ganA' 'ganQ	Linear	This study	GAGAGTTGCCCTGGAGACAGGGGAGTTCTTCAAAATTTCATCTAATATTAATTTTTGATTCATTTTTTTTACTAAAGCTTGATCTGCAATTTGAATAATAACCACTCCTTTGTTTATCCACCGAACTAAGTTGGTGTTTTTTGAAGCTTGAATTAGATATTTAAAAGTATCATATCTAATATTATAACTAAATTTTCTAAAAAAAACATTGAAATAAACATTTATTTTGTATATGATGAGATAAAGTTAGTTTATTGGATAAACAAACTAACTCAATTAAGATAGTTGATGGATAAACTTGTTCACTTAAATCAAAGGGGGAAATGACAAATGGTCCAAACTAGTGATATCTAAAAATCAAAGGGGGAAATGGGATCCATGGATAAGAAATACTCAATA…
pCW605	xylR' PXYL-cas9D10A-H840A zeo ganA' 'ganQ	Linear	This study	GAGAGTTGCCCTGGAGACAGGGGAGTTCTTCAAAATTTCATCTAATATTAATTTTTGATTCATTTTTTTTACTAAAGCTTGATCTGCAATTTGAATAATAACCACTCCTTTGTTTATCCACCGAACTAAGTTGGTGTTTTTTGAAGCTTGAATTAGATATTTAAAAGTATCATATCTAATATTATAACTAAATTTTCTAAAAAAAACATTGAAATAAACATTTATTTTGTATATGATGAGATAAAGTTAGTTTATTGGATAAACAAACTAACTCAATTAAGATAGTTGATGGATAAACTTGTTCACTTAAATCAAAGGGGGAAATGACAAATGGTCCAAACTAGTGATATCTAAAAATCAAAGGGGGAAATGGGATCCATGGATAAGAAATACTCAATA…
pCW640	relA apt erm yrvD yrvC 'secDF	Linear	This study	TTGCTTCTGTTACTCGCTGAACAACTAATCTCTTTTCTAACCCCTTTAGTTCATGACGCGGCGCACAGAATAGATATCTCTAATCTGTTTAATACGCTCGACGACTTTATGCAAGTGATTGATATTCTGGATAAAAATCGCCATATGGATGGTTGCCACTTTATTGCGATCCGATTTGCCAGAGACAGATGAAATATTGGTTTTCGTTTCATTCACTGCCTGGAGTACCTCGTTCAGCAATCCGCGGCGGTCATACCCAAGAATCTCTATCTCAACATTGTATTCCTTGCGCTTTTGAACTTGTGACTCATGTTCCCACTCTACCGGGATCAGCCGCTCTTGGGCTTCATTCGTTTTGACATTCGGACAGTCTTCGCGATGGACCGAAACCCCTCTGCC…
pCW672	yhfP' yhfO aprE' cat 'lacI PXYL-sgRNA-90deg-sense 'aprE yhfN yhfM 'yhfL	Linear	This study	AGATTCTGTGGCAAAGGCACCAGCCAGTCACCAGGCACCGAAGCGTATTCACTTAATCCGCCATCACGTGAGACACCGAGCTCATAGCTTGTCGCGATCACCTCATCCCCCTCCGCAAAACGCGGATCATTGGAAGAGACGACCGTACCCGCAGCATCAATGCCTAAAATAAGCGGATACTCTCTGACGATATTGCCTCCTGCTTTTCCGGCCAGACCATCTTTGTAATTAATGCCGGAATAAGCAACTTTAATCAGGACACCATCCTTCGGCAAATCCTCTGTTGATATGGTTTTCACATGGACTGAAACATCATCGGCATTTTTTTCTGCCTGCAAGGCTTGAAATAACGTTGACATTCGGCACACTCCTTTTCATTTATATCGTAACCGAAGAACG…
pCW702	yhaR yhzD natA natB kan yhaM yhaL prsA yhzE 'yhaJ	Linear	This study	AAGTAAGCGCATACATGGAGGTGCTTTTAATGGAGTTTGTTCAATATGCATGTAATGGGGCCGTTGCAGAGATTATCCTGAATCGGCCTGATGCCCATCACGCCCTGAATGAACAGATGCTGTCTGAATTGAAGGAGGCAGTCGAAATGGCGGCTGCAAGCGAGGCGCTCATCGTTCTCCTGAGAGGAAGCGGGAAAGGCTTTTCGGCCGGCGGTGATATCAGGATGATGACGTCAGAGCATGACCCTGACCAATTTAAACGGCTGATGGATACGATTGAGGCTGTCACCCTGAATTTATATCAGATGAAGAAAGTGACAATTGCAGCCATTCATGGTGCTGCTGCGGGACTGGGCCTGAGTTTGGCGCTTTGTGCGGACATTGTGCTCGCTGAAAAAA…
pCW717	bla colE1 aprE' cat 'lacI PVEG-sgRNA-135deg-sense 'aprE	Circular	This study	TTGAAGCATTTATCAGGGTTATTGTCTCATGAGCGGATACATATTTGAATGTATTTAGAAAAATAAACAAATAGGGGTTCCGCGCACATTTCCCCGAAAAGTGCCACCTGACGTCTAAGAAACCATTATTATCATGACATTAACCTATAAAAATAGGCGTATCACGAGGCCCTTTCGTCTTCAAGAATTGGCGAGAGATGATATACCTAAATAGAGATAAAATCATCTCAAAAAAATGGGTCTACTAAAATATTATTCCATCTATTACAATAAATTCACAGAATAGTCTTTTAAGTAAGTCTACTCTGAATTTTTTTAAAAGGAGAGGGTAAAGAGTGAGAAGCAAAAAATTGTGGATCAGCTTGTTGTTTGCGTTAACGTTAATCTTTACGATGGCGT…
pCW720	yrzF' yrbE csbX bofC kan queA tgt yajC yrzE yrbG'	Linear	This study	TTGACTGCTGTCGCTTGATATTCCGGAAAAAATACTTTCAGCGCCATTTTTCGACCGCCTTCTGTTAAGGCAAACACATAGGCGCTTCTTCCCTTGCCGATTAGTGTTAATTCCTCGGATTTCTCTTTGACTTTATCAAATCTGCTGTTCTTGCGGTATATGACGGTATGGGCCAGTGCCTCTGCTTTTGTCAGCATTTCATTCACCTTCTTTGCTCTATTTTATGCAGCTGTTTATAGGAAAATCATAAACTGTTCAGGAAAAAGAGCCTAATTCTAGTGTATCTGGTCTTGAAGAAGAAGGCTACTTATAAGCATGAATTGTGATAAAAGAGACATAGAACGTTTAATTTCCATTCTTGAAAAGCGCTTACAAATGGGATAGTATTAATTTTAAATA…
pCW732	yyaE yyaF rpsF tet rpsR exoAA ccpB yyaH maa 'yyaJ	Linear	This study	TTGCACAGCCATGATTATGCGAATAACGGTCTGTTAAAAGCGCTTGATCAGCGTTTTTTTAATGGATATGGCGGCGTGACCGAAATCGTCGGAAGCATATGCTGGGGCTCCGGTATCGAGGCGCAAAGCTGGGATTTTGGCCGTTCGTACGGTCACGGACCGCTTGATATTTACAACAGCAAGCATGTTGTTGTGTGGGGAAGAAATGTATCAAGAACAAATATGCACTTATACCATCACTTGCAGCAGGTGAAAAAGAAGGGCGCCACGATTACGGTGATTGATCCGATCTTCAACCCGACTGCTAAGCTTGCCGACCGCTATATCTCTGTAAAGCCTGGAATGGACGGCTGGCTTGCGGCAGCCGTTTTGAAGGTTCTGATTGAGATGGGAAGAACG…
pCW734	bla colE1 'amyE spc PHAT-ssbA lacIQQ amyE'	Circular	This study	ACTACTTACTCTAGCTTCCCGGCAACAATTAATAGACTGGATGGAGGCGGATAAAGTTGCAGGACCACTTCTGCGCTCGGCCCTTCCGGCTGGCTGGTTTATTGCTGATAAATCTGGAGCCGGTGAGCGTGGGTCTCGCGGTATCATTGCAGCACTGGGGCCAGATGGTAAGCCCTCCCGTATCGTAGTTATCTACACGACGGGGAGTCAGGCAACTATGGATGAACGAAATAGACAGATCGCTGAGATAGGTGCCTCACTGATTAAGCATTGGTAACTGTCAGACCAAGTTTACTCATATATACTTTAGATTGATTTAAAACTTCATTTTTAATTTAAAAGGATCTAGGTGAAGATCCTTTTTGATAATCTCATGACCAAAATCCCTTAACGTGAGTT…
pCW736	bla colE1 'amyE spc PHAT-ssbAΔCTT lacIQQ amyE'	Circular	This study	ACTACTTACTCTAGCTTCCCGGCAACAATTAATAGACTGGATGGAGGCGGATAAAGTTGCAGGACCACTTCTGCGCTCGGCCCTTCCGGCTGGCTGGTTTATTGCTGATAAATCTGGAGCCGGTGAGCGTGGGTCTCGCGGTATCATTGCAGCACTGGGGCCAGATGGTAAGCCCTCCCGTATCGTAGTTATCTACACGACGGGGAGTCAGGCAACTATGGATGAACGAAATAGACAGATCGCTGAGATAGGTGCCTCACTGATTAAGCATTGGTAACTGTCAGACCAAGTTTACTCATATATACTTTAGATTGATTTAAAACTTCATTTTTAATTTAAAAGGATCTAGGTGAAGATCCTTTTTGATAATCTCATGACCAAAATCCCTTAACGTGAGTT…
pCW758	yhfP' yhfO aprE' cat 'lacI PVEG-sgRNA+90deg-sense 'aprE yhfN yhfM 'yhfL	Linear	This study	AGATTCTGTGGCAAAGGCACCAGCCAGTCACCAGGCACCGAAGCGTATTCACTTAATCCGCCATCACGTGAGACACCGAGCTCATAGCTTGTCGCGATCACCTCATCCCCCTCCGCAAAACGCGGATCATTGGAAGAGACGACCGTACCCGCAGCATCAATGCCTAAAATAAGCGGATACTCTCTGACGATATTGCCTCCTGCTTTTCCGGCCAGACCATCTTTGTAATTAATGCCGGAATAAGCAACTTTAATCAGGACACCATCCTTCGGCAAATCCTCTGTTGATATGGTTTTCACATGGACTGAAACATCATCGGCATTTTTTTCTGCCTGCAAGGCTTGAAATAACGTTGACATTCGGCACACTCCTTTTCATTTATATCGTAACCGAAGAACG…
pCW759	yhfP' yhfO aprE' cat 'lacI PXYL-sgRNA-90deg-antisense 'aprE yhfN yhfM 'yhfL	Linear	This study	AGATTCTGTGGCAAAGGCACCAGCCAGTCACCAGGCACCGAAGCGTATTCACTTAATCCGCCATCACGTGAGACACCGAGCTCATAGCTTGTCGCGATCACCTCATCCCCCTCCGCAAAACGCGGATCATTGGAAGAGACGACCGTACCCGCAGCATCAATGCCTAAAATAAGCGGATACTCTCTGACGATATTGCCTCCTGCTTTTCCGGCCAGACCATCTTTGTAATTAATGCCGGAATAAGCAACTTTAATCAGGACACCATCCTTCGGCAAATCCTCTGTTGATATGGTTTTCACATGGACTGAAACATCATCGGCATTTTTTTCTGCCTGCAAGGCTTGAAATAACGTTGACATTCGGCACACTCCTTTTCATTTATATCGTAACCGAAGAACG…
pCW760	yhfP' yhfO aprE' cat 'lacI PVEG-sgRNA-90deg-antisense 'aprE yhfN yhfM 'yhfL	Linear	This study	AGATTCTGTGGCAAAGGCACCAGCCAGTCACCAGGCACCGAAGCGTATTCACTTAATCCGCCATCACGTGAGACACCGAGCTCATAGCTTGTCGCGATCACCTCATCCCCCTCCGCAAAACGCGGATCATTGGAAGAGACGACCGTACCCGCAGCATCAATGCCTAAAATAAGCGGATACTCTCTGACGATATTGCCTCCTGCTTTTCCGGCCAGACCATCTTTGTAATTAATGCCGGAATAAGCAACTTTAATCAGGACACCATCCTTCGGCAAATCCTCTGTTGATATGGTTTTCACATGGACTGAAACATCATCGGCATTTTTTTCTGCCTGCAAGGCTTGAAATAACGTTGACATTCGGCACACTCCTTTTCATTTATATCGTAACCGAAGAACG…
pCW766	bla colE1 'amyE spc PHAT-recF lacIQQ amyE'	Circular	This study	ACTACTTACTCTAGCTTCCCGGCAACAATTAATAGACTGGATGGAGGCGGATAAAGTTGCAGGACCACTTCTGCGCTCGGCCCTTCCGGCTGGCTGGTTTATTGCTGATAAATCTGGAGCCGGTGAGCGTGGGTCTCGCGGTATCATTGCAGCACTGGGGCCAGATGGTAAGCCCTCCCGTATCGTAGTTATCTACACGACGGGGAGTCAGGCAACTATGGATGAACGAAATAGACAGATCGCTGAGATAGGTGCCTCACTGATTAAGCATTGGTAACTGTCAGACCAAGTTTACTCATATATACTTTAGATTGATTTAAAACTTCATTTTTAATTTAAAAGGATCTAGGTGAAGATCCTTTTTGATAATCTCATGACCAAAATCCCTTAACGTGAGTT…
pCW777	pucI' 'ywoD erm PVEG-6xHis-recO ywoC' ywoB amtB	Linear	This study	TCGGAATACAGGTCATCTACCGAGAGCTCACGTTTGCGAATGATAAAATAGTCGGCCATCATCACGCCTGCCACCGGTCCAAGCATGCCGCCTATTAAGCCAAGAAACGCATACACGCTTGTCGCGCTCTCCATCAGCTTCCACGGAACCGTAAATAAAGCGAGCAACGCTGTGATAAAGCTGCCACGTTTGAAATTGATATATTTCGGCAGGGCATTCGCTATATCATAAGCGGGTGATACGATATTCGCCGCGACATTTACAGAGATCGTGGCGATGCAGAGTGTGATCACGGACAAGACGATGACATAAGGGTTATCAAACCGCGCCAAAATATCGACAACATCCCAAATCGGCTCTCCGAACGCGACCTGCGAGCCGGAGGTCACCGTAATACTT…
pCW779	pucI' 'ywoD erm PVEG-6xHis-priAG538D ywoC' ywoB amtB	Linear	This study	TCGGAATACAGGTCATCTACCGAGAGCTCACGTTTGCGAATGATAAAATAGTCGGCCATCATCACGCCTGCCACCGGTCCAAGCATGCCGCCTATTAAGCCAAGAAACGCATACACGCTTGTCGCGCTCTCCATCAGCTTCCACGGAACCGTAAATAAAGCGAGCAACGCTGTGATAAAGCTGCCACGTTTGAAATTGATATATTTCGGCAGGGCATTCGCTATATCATAAGCGGGTGATACGATATTCGCCGCGACATTTACAGAGATCGTGGCGATGCAGAGTGTGATCACGGACAAGACGATGACATAAGGGTTATCAAACCGCGCCAAAATATCGACAACATCCCAAATCGGCTCTCCGAACGCGACCTGCGAGCCGGAGGTCACCGTAATACTT…
pCW781	pucI' 'ywoD erm PVEG-6xHis-recA ywoC' ywoB amtB	Linear	This study	TCGGAATACAGGTCATCTACCGAGAGCTCACGTTTGCGAATGATAAAATAGTCGGCCATCATCACGCCTGCCACCGGTCCAAGCATGCCGCCTATTAAGCCAAGAAACGCATACACGCTTGTCGCGCTCTCCATCAGCTTCCACGGAACCGTAAATAAAGCGAGCAACGCTGTGATAAAGCTGCCACGTTTGAAATTGATATATTTCGGCAGGGCATTCGCTATATCATAAGCGGGTGATACGATATTCGCCGCGACATTTACAGAGATCGTGGCGATGCAGAGTGTGATCACGGACAAGACGATGACATAAGGGTTATCAAACCGCGCCAAAATATCGACAACATCCCAAATCGGCTCTCCGAACGCGACCTGCGAGCCGGAGGTCACCGTAATACTT…
pCW783	pucI' 'ywoD erm PVEG-6xHis-recG ywoC' ywoB amtB	Linear	This study	TCGGAATACAGGTCATCTACCGAGAGCTCACGTTTGCGAATGATAAAATAGTCGGCCATCATCACGCCTGCCACCGGTCCAAGCATGCCGCCTATTAAGCCAAGAAACGCATACACGCTTGTCGCGCTCTCCATCAGCTTCCACGGAACCGTAAATAAAGCGAGCAACGCTGTGATAAAGCTGCCACGTTTGAAATTGATATATTTCGGCAGGGCATTCGCTATATCATAAGCGGGTGATACGATATTCGCCGCGACATTTACAGAGATCGTGGCGATGCAGAGTGTGATCACGGACAAGACGATGACATAAGGGTTATCAAACCGCGCCAAAATATCGACAACATCCCAAATCGGCTCTCCGAACGCGACCTGCGAGCCGGAGGTCACCGTAATACTT…
pCW785	pucI' 'ywoD erm PVEG-6xHis-recR ywoC' ywoB amtB	Linear	This study	TCGGAATACAGGTCATCTACCGAGAGCTCACGTTTGCGAATGATAAAATAGTCGGCCATCATCACGCCTGCCACCGGTCCAAGCATGCCGCCTATTAAGCCAAGAAACGCATACACGCTTGTCGCGCTCTCCATCAGCTTCCACGGAACCGTAAATAAAGCGAGCAACGCTGTGATAAAGCTGCCACGTTTGAAATTGATATATTTCGGCAGGGCATTCGCTATATCATAAGCGGGTGATACGATATTCGCCGCGACATTTACAGAGATCGTGGCGATGCAGAGTGTGATCACGGACAAGACGATGACATAAGGGTTATCAAACCGCGCCAAAATATCGACAACATCCCAAATCGGCTCTCCGAACGCGACCTGCGAGCCGGAGGTCACCGTAATACTT…
pCW802	addBD961A addA kan sbcD sbcC'	Linear	This study	TTGGGAGCAGAGTTTTTAGTAGGCAGGTCCGGGAGTGGAAAAACGAAGCTGATCATCAACAGCATTCAGGATGAATTGCGCCGGGCTCCATTCGGGAAGCCGATCATTTTTCTAGTCCCGGATCAAATGACGTTTTTAATGGAATACGAGCTTGCTAAAACGCCAGATATGGGCGGGATGATACGCGCTCAAGTGTTCAGTTTTTCACGATTGGCCTGGCGCGTCCTCCAGCATACGGGAGGAATGAGCAGGCCGTTTCTGACGAGCACCGGCGTACAAATGCTCCTGCGGAAGCTCATTGAGGAGCATAAACAGGAGTTCAAAGTCTATCAAAAAGCGAGTGACAAAAGCGGGTTTACCGCACAGGTTGAGCGGATGCTGACAGAGTTTAAGCGCTAT…
pCW803	addB addAD1172A kan sbcD sbcC'	Linear	This study	TTGGGAGCAGAGTTTTTAGTAGGCAGGTCCGGGAGTGGAAAAACGAAGCTGATCATCAACAGCATTCAGGATGAATTGCGCCGGGCTCCATTCGGGAAGCCGATCATTTTTCTAGTCCCGGATCAAATGACGTTTTTAATGGAATACGAGCTTGCTAAAACGCCAGATATGGGCGGGATGATACGCGCTCAAGTGTTCAGTTTTTCACGATTGGCCTGGCGCGTCCTCCAGCATACGGGAGGAATGAGCAGGCCGTTTCTGACGAGCACCGGCGTACAAATGCTCCTGCGGAAGCTCATTGAGGAGCATAAACAGGAGTTCAAAGTCTATCAAAAAGCGAGTGACAAAAGCGGGTTTACCGCACAGGTTGAGCGGATGCTGACAGAGTTTAAGCGCTAT…
pCW804	addB addAK36A kan sbcD sbcC'	Linear	This study	TTGGGAGCAGAGTTTTTAGTAGGCAGGTCCGGGAGTGGAAAAACGAAGCTGATCATCAACAGCATTCAGGATGAATTGCGCCGGGCTCCATTCGGGAAGCCGATCATTTTTCTAGTCCCGGATCAAATGACGTTTTTAATGGAATACGAGCTTGCTAAAACGCCAGATATGGGCGGGATGATACGCGCTCAAGTGTTCAGTTTTTCACGATTGGCCTGGCGCGTCCTCCAGCATACGGGAGGAATGAGCAGGCCGTTTCTGACGAGCACCGGCGTACAAATGCTCCTGCGGAAGCTCATTGAGGAGCATAAACAGGAGTTCAAAGTCTATCAAAAAGCGAGTGACAAAAGCGGGTTTACCGCACAGGTTGAGCGGATGCTGACAGAGTTTAAGCGCTAT…
pCW809	yloC ylzA gmk rpoZ coaBC kan def fmt rsmB yloN'	Linear	This study	AATGATACGAAGTATGACAGGCTTCGGCAGTGCAAGCAAAACACAAGACGATCTCTCTGTAAGCGTTGAACTTAAATCTGTGAACTACAGATTTAAAGAAGTGAACGCTCGTTTGCCAAGGCCTTTGCTATATTTTGAAGATAAGCTGAAACAGACCATTCTGCAGCATATTCAGCGCGGAAGAATTGAGCTTTTCGTATCCGTTGACAGCGATATGCTTGTTGAGAAAAGGCTTGAAATTGATTGGCCGCTGCTCGATGAGTTTGTCGCAGCCGCGAGAGATATGAAGAAGCGGTATCAATTGTCTGCAGAGCCCGATGTAATGGATTTCTTTAAGCTTGATCATGTCGTCCAGGTTCATGAAGAACAGACGCAAAATGACAAGCTGGAGGCGTTGAT…
pCW834	yloV sdaAB sdaAA erm ylpC plsX fabD fabG'	Linear	This study	ATGCACTTGAGTTTGCCGCTGCGCTGCAAGCAGGTGTAGACATGGCGTATAAAGCTGTCATGAAACCTGTAGAGGGCACCATTTTAACAGTTGCAAAAGACGCTGCAAAAAAAGCAATGATCTTAGCAGAAAAAGAAACCGATATCACTGCGCTGATGACTGCAGTGACAGAAGAAGCAGAGGCGTCTTTAAACCGCACCCCTGAATTGCTACCTGTCCTAAAGGAAGTAGGAGTTGTCGATAGCGGGGGCAAAGGCCTGCTCTGTGTGTATGAAGGTTTCCTTGCTTCATTAAAAGGTGAAACTGTACCTCAGAAAGCAGTTCTTCCGTCACTTGACGACATGGTCAGCGCAGAGCATCACAAGAGCGCGCAAAGCATGATGAATACCGAAGATATTG…
pCW848	addBD961A addAD682E-D1172A kan sbcD sbcC'	Linear	This study	TTGGGAGCAGAGTTTTTAGTAGGCAGGTCCGGGAGTGGAAAAACGAAGCTGATCATCAACAGCATTCAGGATGAATTGCGCCGGGCTCCATTCGGGAAGCCGATCATTTTTCTAGTCCCGGATCAAATGACGTTTTTAATGGAATACGAGCTTGCTAAAACGCCAGATATGGGCGGGATGATACGCGCTCAAGTGTTCAGTTTTTCACGATTGGCCTGGCGCGTCCTCCAGCATACGGGAGGAATGAGCAGGCCGTTTCTGACGAGCACCGGCGTACAAATGCTCCTGCGGAAGCTCATTGAGGAGCATAAACAGGAGTTCAAAGTCTATCAAAAAGCGAGTGACAAAAGCGGGTTTACCGCACAGGTTGAGCGGATGCTGACAGAGTTTAAGCGCTAT…
pCW850	bla colE1 'amyE spc PHAT-mNeonGreen-addAK36A lacIQQ amyE'	Circular	This study	ACTACTTACTCTAGCTTCCCGGCAACAATTAATAGACTGGATGGAGGCGGATAAAGTTGCAGGACCACTTCTGCGCTCGGCCCTTCCGGCTGGCTGGTTTATTGCTGATAAATCTGGAGCCGGTGAGCGTGGGTCTCGCGGTATCATTGCAGCACTGGGGCCAGATGGTAAGCCCTCCCGTATCGTAGTTATCTACACGACGGGGAGTCAGGCAACTATGGATGAACGAAATAGACAGATCGCTGAGATAGGTGCCTCACTGATTAAGCATTGGTAACTGTCAGACCAAGTTTACTCATATATACTTTAGATTGATTTAAAACTTCATTTTTAATTTAAAAGGATCTAGGTGAAGATCCTTTTTGATAATCTCATGACCAAAATCCCTTAACGTGAGTT…
pCW854	ypqA yppG yppF yppE yppD sspM yppC erm ponA ypoC 'nth	Linear	This study	AAGGCGGTGGCGATATTGGAATTCCATGATGACAAAAAGAACGAACTGCAAAAGAAAGAAGAAATCATAACGGAGGCAATCGACACTCTTTTTCAATCCTCAGCGTTCGGCAACCTTATAAACGGATTTCAGAACCTAATCAACTCGAGTTTAAAGGATGTGCAGACGACCATACATGTCAGAGAAAGAGATACTGGGCTGTATATCGATATTACCATTCCGGCGACGTTTCGAGATGGCGAGATCGTCGTTGATGTTAAATCGAGGTATCTCCATGTAACACTCCAAGAAAAACAGAAACACCAAAATGAGGCTACCTTTACAAGCATGACAAGAACGGTTCAGCTGCCTTATGAAGTTCGCCAAGAAGATATGGAAACGTCTTGGAACGAGCAGACA…
pCW855	bla colE1 aprE' cat 'lacI PVEG-sgRNA-45deg-antisense 'aprE	Linear	This study	TTGAAGCATTTATCAGGGTTATTGTCTCATGAGCGGATACATATTTGAATGTATTTAGAAAAATAAACAAATAGGGGTTCCGCGCACATTTCCCCGAAAAGTGCCACCTGACGTCTAAGAAACCATTATTATCATGACATTAACCTATAAAAATAGGCGTATCACGAGGCCCTTTCGTCTTCAAGAATTGGCGAGAGATGATATACCTAAATAGAGATAAAATCATCTCAAAAAAATGGGTCTACTAAAATATTATTCCATCTATTACAATAAATTCACAGAATAGTCTTTTAAGTAAGTCTACTCTGAATTTTTTTAAAAGGAGAGGGTAAAGAGTGAGAAGCAAAAAATTGTGGATCAGCTTGTTGTTTGCGTTAACGTTAATCTTTACGATGGCGT…
pCW857	bla colE1 aprE' cat 'lacI PVEG-sgRNA-135deg-antisense 'aprE	Linear	This study	TTGAAGCATTTATCAGGGTTATTGTCTCATGAGCGGATACATATTTGAATGTATTTAGAAAAATAAACAAATAGGGGTTCCGCGCACATTTCCCCGAAAAGTGCCACCTGACGTCTAAGAAACCATTATTATCATGACATTAACCTATAAAAATAGGCGTATCACGAGGCCCTTTCGTCTTCAAGAATTGGCGAGAGATGATATACCTAAATAGAGATAAAATCATCTCAAAAAAATGGGTCTACTAAAATATTATTCCATCTATTACAATAAATTCACAGAATAGTCTTTTAAGTAAGTCTACTCTGAATTTTTTTAAAAGGAGAGGGTAAAGAGTGAGAAGCAAAAAATTGTGGATCAGCTTGTTGTTTGCGTTAACGTTAATCTTTACGATGGCGT…
pCW859	addB addA erm ylsB gerPF gerPE gerPD gerPC gerPB gerPA yisI 'yisJ	Linear	This study	AAGTGGTTCGCCTCATGGATACAACCCTTCAAGAGGGACGTTCAAATATCATAAACGCCGGCTTGAAAAAAGACGGCTCTCTCAGATCAGACTCAGCAGCAGTCGGTGAAAAGGAATTTGATCTTTTGACAAAGCATGTGCGCCGCACCTTCCAAGAAGCGGGCGAACAAATCACCGACGGGCGCGTATCCATTGAGCCGTACAAAATGAAGAACAAGACGCCGTGCACATACTGTGCGTTCAAATCAGTATGCCAATTTGATGAATCACTGGAAGAAAACGAGTATCGCCCATTAAAGGCTGAAAAGGACAAGACAATACTTGAGTGGATAAAAAAGGAGGCGGATGGCAATGAACATTCCTAAACCGGCAGACAGCACATGGACAGATGACCAATGG…
pJMP1	rop colE1 bla 'ganA xylR PXYL-cas9D10A-H840A erm ganA'	Circular	DOI: 10.1016/j.cell.2016.05.003	ATCCTGATATTGTCTGCATTTGCGCCGGAGCAAACCAAAAACCTGGTGAGACACGCCTTGAATTAGTAGAAAAGAACTTGAAGATTTTCAAAGGCATCGTTAGTGAAGTCATGGCGAGCGGATTTGACGGCATTTTCTTAGTCGCGACGCGAGGCTGGATGGCCTTCCCCATTATGATTCTTCTCGCTTCCGGCGGCATCGGGATGCCCGCGTTGCAGGCCATGCTGTCCAGGCAGGTAGATGACGACCATCAGGGACAGCTTCAAGGATCGCTCGCGGCTCTTACCAGCCTAACTTCGATCACTGGACCGCTGATCGTCACGGCGATTTATGCCGCCTCGGCGAGCACATGGAACGGGTTGGCATGGATTGTAGGCGCCGCCCTATACCTTGTCTGCC…
